# Supplementary material for: DeepASmRNA: Reference-free prediction of alternative splicing events with a scalable and interpretable deep learning model
Source: PubMed Central journal article supplement — iScience. 2022 Oct 14;25(11):105345. doi: 10.1016/j.isci.2022.105345 (PMC9619290; doi:10.1016/j.isci.2022.105345), 2022-10-14
Supplement: mmc1.pdf [file mmc1.pdf]

iScience, Volume 25

## **Supplemental information**

**DeepASmRNA: Reference-free prediction  
of alternative splicing events with a scalable  
and interpretable deep learning model**

**Lei Cao, Quanbao Zhang, Hongtao Song, Kui Lin, and Erli Pang**

## Supplementary Data Index

|                                   |          |
|-----------------------------------|----------|
| <b>SUPPLEMENTARY FIGURES.....</b> | <b>2</b> |
| <b>SUPPLEMENTARY TABLES .....</b> | <b>7</b> |

## Supplementary Figures

**Supplementary Figure S1.** The ROC curves (receiver operating characteristic curves) of DeepASmRNA, Related to Figure 4. (A) *Arabidopsis thaliana*. (B) Rice. AUCs (area under the curves) are listed at the bottom right of each subplot. Solid lines with different colors represent four types of AS events, while dotted lines represent micro- and macro-average ROC curves. Micro-average regards each instance equally, while macro-average considers each class equally.

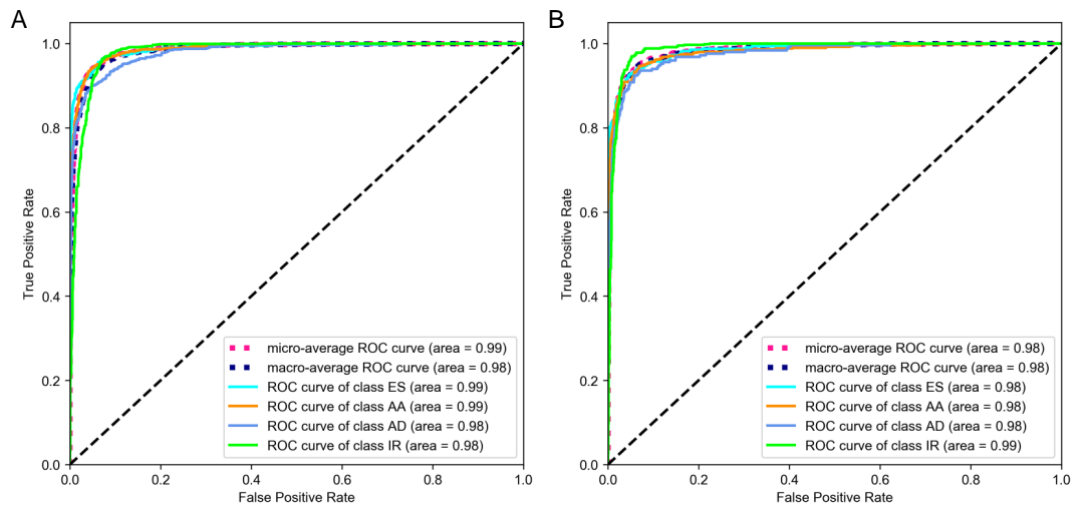

**Supplementary Figure S2.** The visualization of the precision mask of DeepASmRNA, Related to Figure 5. (A) Cross entropy loss value of human model using 0 mask each base on each position. (B) Cross entropy loss value of human model using 1 mask each base on each position. (C) Cross entropy loss value of *Arabidopsis thaliana* model using 0 mask each base on each position. (D) Cross entropy loss value of *Arabidopsis thaliana* model using 1 mask each base on each position. The x-axis represents the position to be masked, and the y-axis indicates the mean of scaled importance scores of the top ten sequences with the lowest loss in each class of AS event.

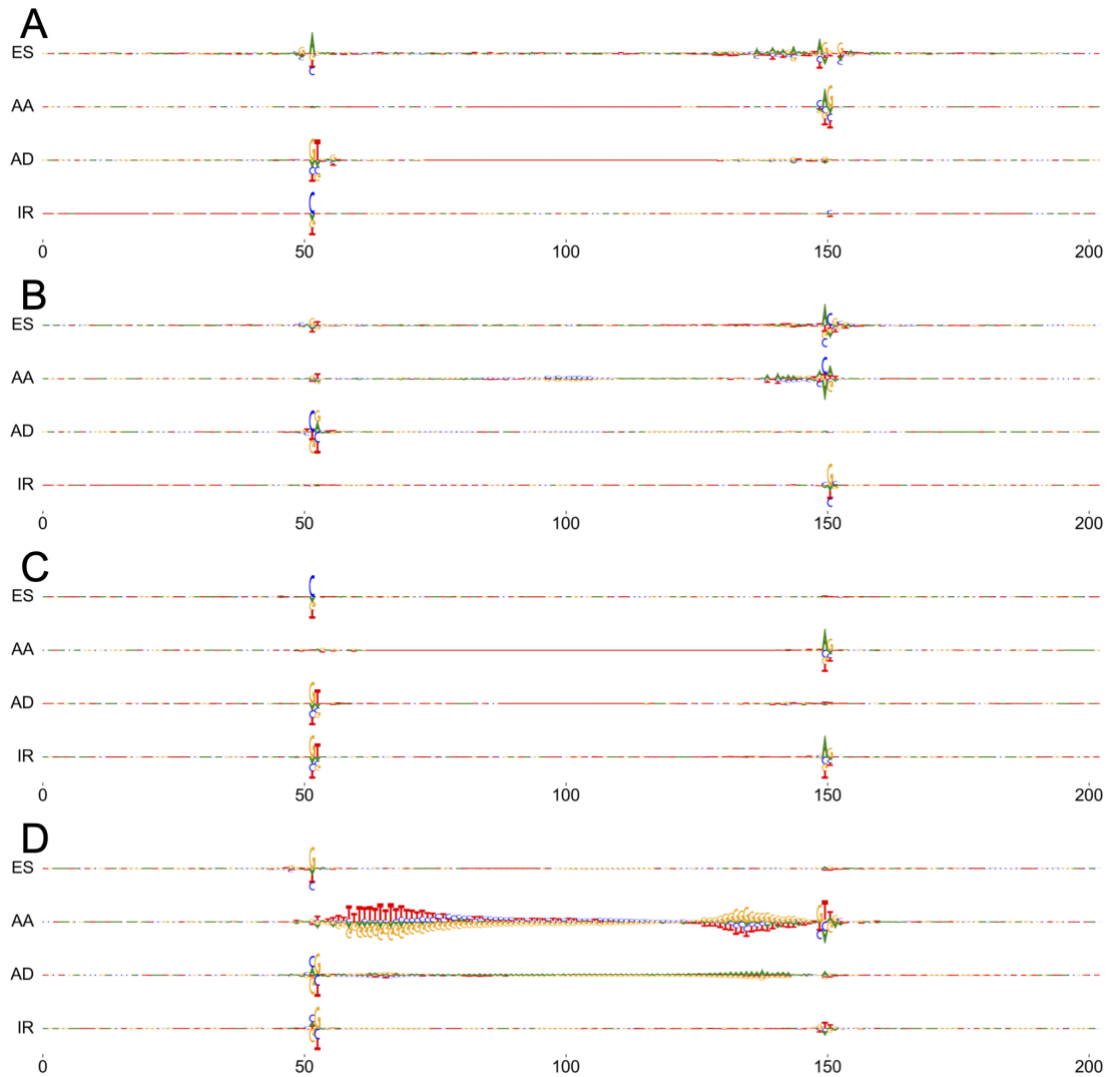

**Supplementary Figure S3.** Sequence logo of four types of AS events, Related to Figure 5. (A) Exon skipping (ES). (B) Alternative acceptor site (AA). (C) Alternative donor site (AD). (D) Intron retention (IR). The X-axis represents the position of the sequence. Positions S1 and S2 are splicing sites. Three bases are taken upstream and downstream of each of the two splicing sites. Y-axis indicates Shannon entropy.

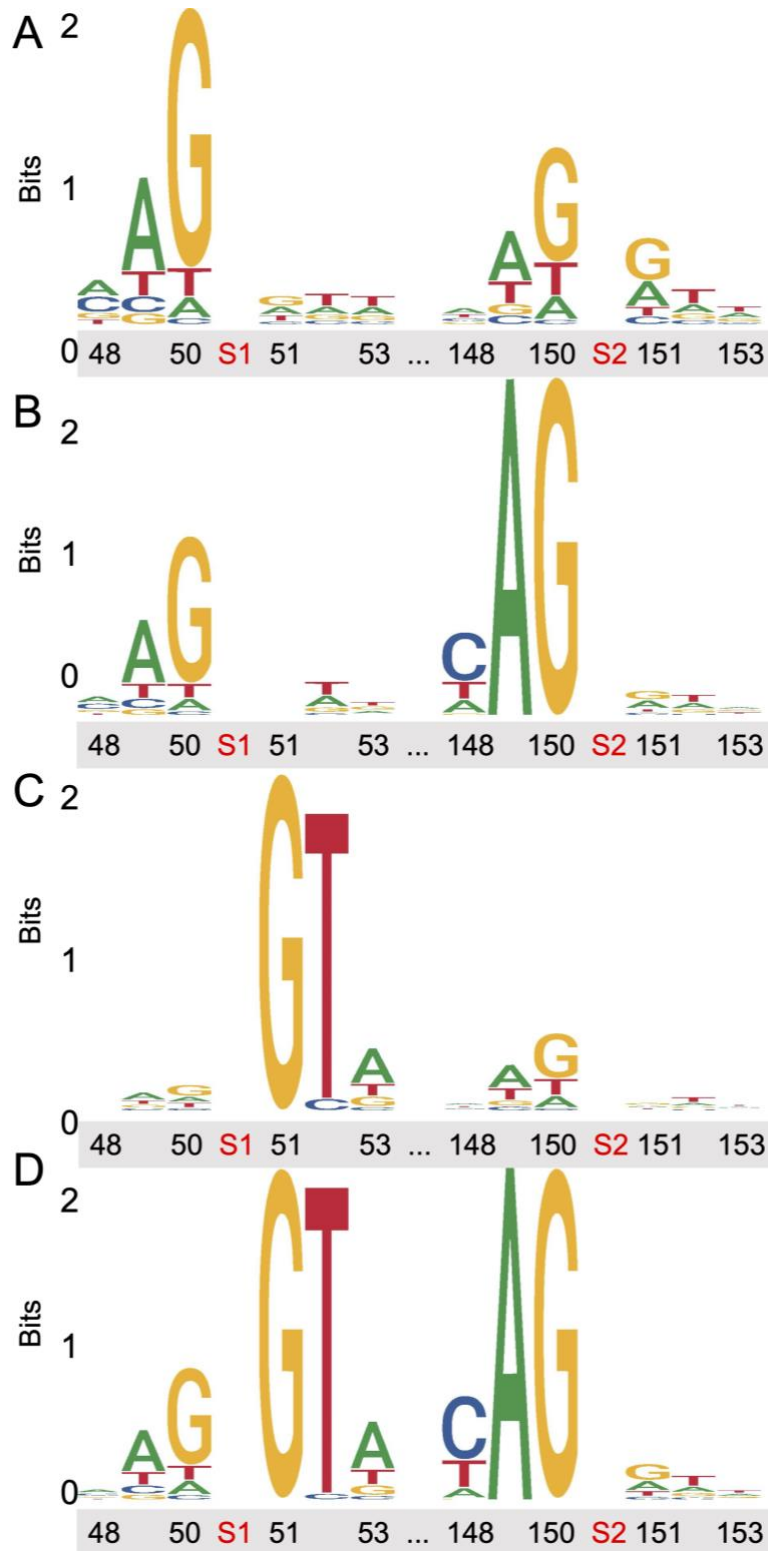

**Supplementary Figure S4.** Venn graph of AS events of Iso-Seq data from *Amborella* identified by DeepASmRNA, AStrap, and PASA, of Iso-Seq data from *Amborella*, Related to Figure 6. (A) Exon skipping (ES). (B) Alternative acceptor site (AA). (C) Alternative donor site (AD). (D) Intron retention (IR).

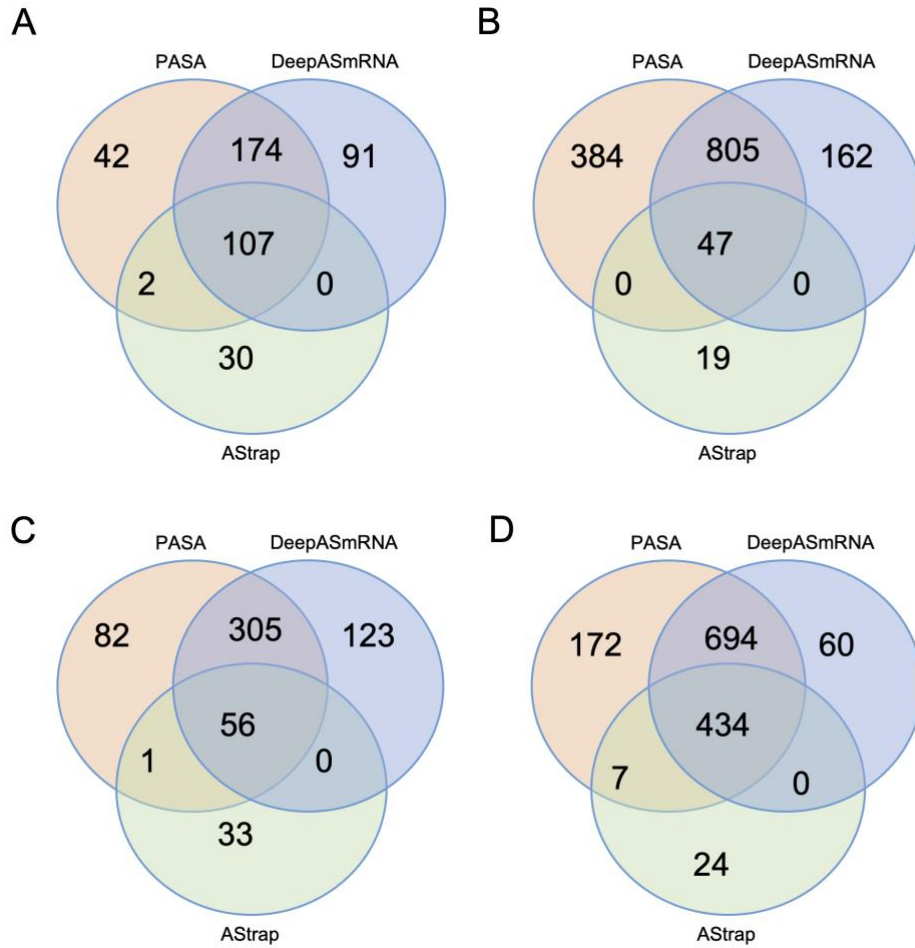

**Supplementary Figure S5.** The extracted mRNA transcript sequence, Related to STAR Methods. (A) Exon skipping (ES). (B) Alternative acceptor site (AA). (C) Alternative donor site (AD). (D) Intron retention (IR).

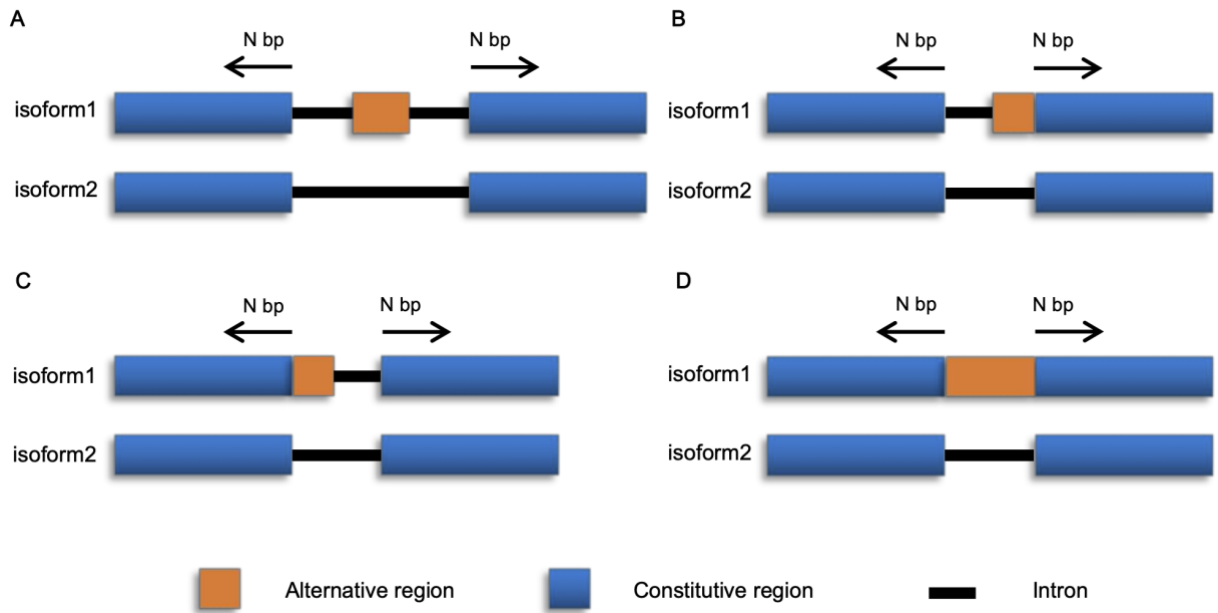

## Supplementary Tables

**Supplementary Table S1.** Information of genomes, Related to STAR Methods

| Features                                       | Human      | <i>Arabidopsis thaliana</i> | Rice   |
|------------------------------------------------|------------|-----------------------------|--------|
| Genome version                                 | GRCh38.p13 | Araport11                   | MSU7   |
| Annotation version                             | v37        | v11                         | v7.0   |
| Number of genes                                | 19 951     | 27 654                      | 55 803 |
| Number of transcripts                          | 159 505    | 48 358                      | 66 338 |
| Number of genes occurring alternative splicing | 17 141     | 10 695                      | 6459   |



**Supplementary Table S2.** Performance of identification of AS transcripts in human, *Arabidopsis thaliana*, and rice using the SUPPA2 datasets as the ground truth, Related to Figure 2

| Method      | Features                      | Human   | <i>Arabidopsis thaliana</i> | Rice      |
|-------------|-------------------------------|---------|-----------------------------|-----------|
| DeepASmRNA  | Predicted AS transcript pairs | 204 910 | 21 747                      | 8 873     |
|             | True positive                 | 187 083 | 20 595                      | 8 269     |
|             | False positive                | 17 827  | 1 152                       | 604       |
|             | False negative                | 45 825  | 4 369                       | 2 120     |
|             | Precision (%)                 | 91.30   | 94.70                       | 93.19     |
|             | Recall (%)                    | 80.32   | 82.50                       | 79.59     |
|             | F1-score                      | 0.85    | 0.88                        | 0.86      |
| AStrap      | Predicted AS transcript pairs | 44 085  | 9 791                       | 5 247     |
|             | True positive                 | 22 081  | 9 373                       | 5 091     |
|             | False positive                | 22 004  | 418                         | 156       |
|             | False negative                | 210 827 | 15 591                      | 5 298     |
|             | Precision (%)                 | 50.08   | 95.73                       | 97.03     |
|             | <i>P</i> -value <sup>1</sup>  | 0       | 0.5363                      | 0.1080    |
|             | Recall (%)                    | 9.48    | 37.55                       | 49.00     |
|             | <i>P</i> -value <sup>2</sup>  | 0       | 0                           | 1.60e-103 |
|             | F1-score                      | 0.16    | 0.54                        | 0.65      |
| IsoSplitter | Predicted AS transcript pairs | 259 915 | 20 376                      | 8 482     |
|             | True positive                 | 125 276 | 16 641                      | 7 246     |
|             | False positive                | 134 639 | 3 735                       | 1 236     |
|             | False negative                | 107 632 | 8 323                       | 3 143     |
|             | Precision (%)                 | 48.20   | 81.67                       | 85.43     |
|             | <i>P</i> -value <sup>3</sup>  | 0       | 3.25e-25                    | 8.64e-05  |
|             | Recall (%)                    | 53.79   | 66.66                       | 69.75     |
|             | <i>P</i> -value <sup>4</sup>  | 0       | 2.22e-54                    | 5.28e-10  |
|             | F1-score                      | 0.51    | 0.73                        | 0.77      |

<sup>1</sup> Fisher's exact test of the precision between DeepASmRNA and AStrap.

<sup>2</sup> Fisher's exact test of the recall between DeepASmRNA and AStrap.

<sup>3</sup> Fisher's exact test of the precision between DeepASmRNA and IsoSplitter.

<sup>4</sup> Fisher's exact test of the recall between DeepASmRNA and IsoSplitter.

**Supplementary Table S3.** Performance of DeepASmRNA in AS classification for different sequence length, Related to Figure 4

| Species                     | Input Segment Length (bp) | 10    | 20    | 30    | 40    | 50    | 60    |
|-----------------------------|---------------------------|-------|-------|-------|-------|-------|-------|
| Human                       | Accuracy                  | 83.59 | 86.25 | 87.57 | 88.00 | 88.49 | 88.48 |
|                             | Micro-average AUC         | 0.97  | 0.98  | 0.98  | 0.98  | 0.98  | 0.98  |
|                             | Macro-average AUC         | 0.97  | 0.98  | 0.98  | 0.98  | 0.98  | 0.98  |
|                             | ES accuracy               | 87.66 | 90.00 | 90.86 | 90.87 | 91.32 | 91.46 |
|                             | ES precision              | 87.78 | 90.53 | 91.64 | 89.85 | 90.61 | 92.02 |
|                             | ES recall                 | 85.02 | 87.41 | 88.20 | 90.37 | 90.52 | 89.18 |
|                             | ES AUC                    | 0.95  | 0.97  | 0.97  | 0.97  | 0.97  | 0.97  |
|                             | ES F1-score               | 0.86  | 0.89  | 0.90  | 0.90  | 0.91  | 0.91  |
|                             | ES AUPRC                  | 0.95  | 0.96  | 0.97  | 0.97  | 0.97  | 0.97  |
|                             | AA accuracy               | 90.71 | 92.50 | 93.21 | 93.29 | 93.54 | 93.70 |
|                             | AA precision              | 76.96 | 82.55 | 82.83 | 83.61 | 83.93 | 83.31 |
|                             | AA recall                 | 75.20 | 78.40 | 82.52 | 81.87 | 83.01 | 84.95 |
|                             | AA AUC                    | 0.95  | 0.97  | 0.97  | 0.97  | 0.97  | 0.97  |
|                             | AA F1-score               | 0.76  | 0.80  | 0.83  | 0.83  | 0.83  | 0.84  |
|                             | AA AUPRC                  | 0.84  | 0.89  | 0.91  | 0.91  | 0.91  | 0.91  |
|                             | AD accuracy               | 93.36 | 93.77 | 94.45 | 94.87 | 95.19 | 94.91 |
|                             | AD precision              | 78.88 | 78.20 | 80.46 | 84.84 | 85.45 | 83.29 |
|                             | AD recall                 | 84.54 | 89.08 | 90.07 | 85.93 | 87.29 | 88.58 |
|                             | AD AUC                    | 0.98  | 0.98  | 0.98  | 0.98  | 0.99  | 0.99  |
|                             | AD F1-score               | 0.82  | 0.83  | 0.85  | 0.85  | 0.86  | 0.86  |
|                             | AD AUPRC                  | 0.90  | 0.92  | 0.93  | 0.93  | 0.94  | 0.94  |
|                             | IR accuracy               | 95.45 | 96.23 | 96.61 | 96.96 | 96.92 | 96.89 |
|                             | IR precision              | 85.20 | 88.49 | 90.66 | 91.21 | 91.16 | 90.98 |
|                             | IR recall                 | 88.46 | 89.28 | 89.14 | 90.78 | 90.54 | 90.57 |
| IR AUC                      | 0.98                      | 0.99  | 0.99  | 0.99  | 0.99  | 0.99  |       |
| IR F1-score                 | 0.87                      | 0.89  | 0.90  | 0.91  | 0.91  | 0.91  |       |
| IR AUPRC                    | 0.95                      | 0.96  | 0.96  | 0.97  | 0.97  | 0.97  |       |
| <i>Arabidopsis thaliana</i> | Accuracy                  | 87.52 | 89.01 | 89.66 | 90.44 | 90.73 | 90.60 |
|                             | Micro-average AUC         | 0.98  | 0.98  | 0.98  | 0.98  | 0.99  | 0.99  |
|                             | Macro-average AUC         | 0.97  | 0.98  | 0.98  | 0.98  | 0.98  | 0.98  |
|                             | ES accuracy               | 96.11 | 96.60 | 96.99 | 97.38 | 97.38 | 97.50 |
|                             | ES precision              | 90.86 | 87.16 | 90.03 | 94.77 | 91.99 | 93.18 |
|                             | ES recall                 | 78.33 | 86.95 | 86.70 | 84.73 | 87.68 | 87.44 |
|                             | ES AUC                    | 0.98  | 0.99  | 0.98  | 0.99  | 0.99  | 0.99  |

|      |                   |       |       |       |       |       |       |
|------|-------------------|-------|-------|-------|-------|-------|-------|
|      | ES F1-score       | 0.84  | 0.87  | 0.88  | 0.89  | 0.90  | 0.90  |
|      | ES AUPRC          | 0.92  | 0.94  | 0.94  | 0.96  | 0.96  | 0.95  |
|      | AA accuracy       | 93.78 | 94.07 | 95.01 | 95.27 | 95.11 | 95.11 |
|      | AA precision      | 88.11 | 88.94 | 90.87 | 92.02 | 90.99 | 89.60 |
|      | AA recall         | 89.55 | 89.67 | 91.08 | 90.73 | 91.31 | 93.08 |
|      | AA AUC            | 0.98  | 0.98  | 0.98  | 0.98  | 0.99  | 0.99  |
|      | AA F1-score       | 0.89  | 0.89  | 0.91  | 0.91  | 0.91  | 0.91  |
|      | AA AUPRC          | 0.95  | 0.96  | 0.96  | 0.97  | 0.97  | 0.97  |
|      | AD accuracy       | 93.62 | 94.65 | 94.26 | 94.88 | 94.91 | 94.82 |
|      | AD precision      | 90.96 | 90.75 | 91.58 | 94.15 | 92.16 | 94.29 |
|      | AD recall         | 76.91 | 82.68 | 79.72 | 80.34 | 82.53 | 79.88 |
|      | AD AUC            | 0.97  | 0.98  | 0.97  | 0.98  | 0.98  | 0.98  |
|      | AD F1-score       | 0.83  | 0.87  | 0.85  | 0.87  | 0.87  | 0.86  |
|      | AD AUPRC          | 0.93  | 0.94  | 0.93  | 0.94  | 0.94  | 0.95  |
|      | IR accuracy       | 91.54 | 92.71 | 93.07 | 93.36 | 94.07 | 93.78 |
|      | IR precision      | 84.86 | 88.85 | 87.92 | 86.75 | 89.53 | 88.96 |
|      | IR recall         | 94.95 | 92.67 | 95.03 | 97.64 | 95.79 | 95.70 |
|      | IR AUC            | 0.97  | 0.98  | 0.98  | 0.98  | 0.98  | 0.98  |
|      | IR F1-score       | 0.90  | 0.91  | 0.91  | 0.92  | 0.93  | 0.92  |
|      | IR AUPRC          | 0.94  | 0.95  | 0.95  | 0.96  | 0.96  | 0.96  |
| Rice | Accuracy          | 86.80 | 88.29 | 89.31 | 89.78 | 90.02 | 89.96 |
|      | Micro-average AUC | 0.97  | 0.98  | 0.98  | 0.98  | 0.98  | 0.98  |
|      | Macro-average AUC | 0.97  | 0.98  | 0.98  | 0.98  | 0.98  | 0.98  |
|      | ES accuracy       | 95.22 | 94.62 | 95.16 | 94.74 | 95.40 | 95.40 |
|      | ES precision      | 89.56 | 84.29 | 84.11 | 83.61 | 88.22 | 92.31 |
|      | ES recall         | 85.76 | 89.39 | 93.03 | 91.21 | 88.48 | 83.64 |
|      | ES AUC            | 0.97  | 0.98  | 0.98  | 0.98  | 0.98  | 0.99  |
|      | ES F1-score       | 0.88  | 0.87  | 0.88  | 0.87  | 0.88  | 0.88  |
|      | ES AUPRC          | 0.94  | 0.95  | 0.96  | 0.95  | 0.96  | 0.96  |
|      | AA accuracy       | 92.35 | 92.89 | 93.67 | 94.15 | 94.44 | 93.91 |
|      | AA precision      | 89.64 | 93.64 | 91.79 | 95.71 | 93.07 | 91.00 |
|      | AA recall         | 84.29 | 81.91 | 86.68 | 84.29 | 88.07 | 88.47 |
|      | AA AUC            | 0.97  | 0.98  | 0.98  | 0.98  | 0.98  | 0.98  |
|      | AA F1-score       | 0.87  | 0.87  | 0.89  | 0.90  | 0.91  | 0.90  |
|      | AA AUPRC          | 0.95  | 0.96  | 0.96  | 0.96  | 0.97  | 0.96  |
|      | AD accuracy       | 94.50 | 95.28 | 95.10 | 95.64 | 95.52 | 95.28 |
|      | AD precision      | 92.93 | 87.34 | 92.42 | 87.66 | 90.70 | 84.90 |
|      | AD recall         | 68.40 | 80.00 | 73.20 | 82.40 | 78.00 | 83.20 |
|      | AD AUC            | 0.97  | 0.98  | 0.98  | 0.98  | 0.98  | 0.98  |

|              |       |       |       |       |       |       |
|--------------|-------|-------|-------|-------|-------|-------|
| AD F1-score  | 0.79  | 0.84  | 0.82  | 0.85  | 0.84  | 0.84  |
| AD AUPRC     | 0.90  | 0.91  | 0.91  | 0.92  | 0.91  | 0.92  |
| IR accuracy  | 91.52 | 93.79 | 94.68 | 95.04 | 94.68 | 95.34 |
| IR precision | 82.03 | 87.18 | 89.47 | 89.94 | 88.50 | 90.02 |
| IR recall    | 97.29 | 96.62 | 96.28 | 96.79 | 97.63 | 97.63 |
| IR AUC       | 0.98  | 0.98  | 0.99  | 0.99  | 0.99  | 0.99  |
| IR F1-score  | 0.89  | 0.92  | 0.93  | 0.93  | 0.93  | 0.94  |
| IR AUPRC     | 0.94  | 0.96  | 0.97  | 0.97  | 0.97  | 0.98  |

---

**Supplementary Table S4.** Performance in AS classification of DeepASmRNA and AStrap based on AStrap's Dataset and DeepASmRNA's Dataset, Related to Figure 4

| Dataset source | Model      | Species | Overall Accuracy (%) | Precision (%) |       |       |       |
|----------------|------------|---------|----------------------|---------------|-------|-------|-------|
|                |            |         |                      | ES            | AA    | AD    | IR    |
| AStrap         | AStrap     | Human   | 86.5                 | 85.9          | 87.5  | 85.2  | 87.6  |
|                |            | Rice    | 88.3                 | 91.7          | 90.2  | 86.0  | 85.9  |
|                | DeepASmRNA | Human   | 87.84                | 90.96         | 80.35 | 78.47 | 94.31 |
|                |            | Rice    | 91.17                | 80.11         | 92.72 | 86.14 | 93.04 |
| DeepASmRNA     | AStrap     | Human   | 81.44                | 94.99         | 77.00 | 70.61 | 66.15 |
|                |            | Rice    | 90.11                | 72.41         | 96.10 | 82.20 | 95.43 |
|                | DeepASmRNA | Human   | 88.49                | 90.61         | 83.93 | 85.45 | 91.16 |
|                |            | Rice    | 90.02                | 88.22         | 93.07 | 90.7  | 88.5  |

**Supplementary Table S5.** Comparison of DeepASmRNA, LeNet, ResNet, and LSTM in classification, Related to Figure 4

| Species           | Models                      | LeNet    | ResNet | LSTM  | DeepASmRNA |
|-------------------|-----------------------------|----------|--------|-------|------------|
| Human             | Accuracy                    | 88.07    | 85.57  | 88.12 | 88.49      |
|                   | Micro-average AUC           | 0.98     | 0.97   | 0.98  | 0.98       |
|                   | Macro-average AUC           | 0.98     | 0.97   | 0.98  | 0.98       |
|                   | ES accuracy                 | 90.91    | 89.63  | 91.32 | 91.32      |
|                   | ES precision                | 89.37    | 89.62  | 89.72 | 90.61      |
|                   | ES recall                   | 91.09    | 87.61  | 91.65 | 90.52      |
|                   | ES AUC                      | 0.97     | 0.96   | 0.97  | 0.97       |
|                   | ES F1-score                 | 0.90     | 0.89   | 0.91  | 0.91       |
|                   | ES AUPRC                    | 0.97     | 0.96   | 0.97  | 0.97       |
|                   | AA accuracy                 | 93.42    | 91.96  | 93.44 | 93.54      |
|                   | AA precision                | 84.51    | 77.88  | 88.81 | 83.93      |
|                   | AA recall                   | 81.43    | 82.46  | 76.23 | 83.01      |
|                   | AA AUC                      | 0.97     | 0.96   | 0.97  | 0.97       |
|                   | AA F1-score                 | 0.83     | 0.80   | 0.82  | 0.83       |
|                   | AA AUPRC                    | 0.91     | 0.88   | 0.92  | 0.91       |
|                   | AD accuracy                 | 94.89    | 94.17  | 94.65 | 95.19      |
|                   | AD precision                | 84.68    | 82.91  | 82.60 | 85.45      |
|                   | AD recall                   | 86.33    | 83.85  | 87.82 | 87.29      |
|                   | AD AUC                      | 0.98     | 0.98   | 0.98  | 0.99       |
|                   | AD F1-score                 | 0.85     | 0.83   | 0.85  | 0.86       |
|                   | AD AUPRC                    | 0.93     | 0.92   | 0.93  | 0.94       |
|                   | IR accuracy                 | 96.91    | 95.39  | 96.83 | 96.92      |
|                   | IR precision                | 92.11    | 87.05  | 89.04 | 91.16      |
|                   | IR recall                   | 89.34    | 85.42  | 92.66 | 90.54      |
|                   | IR AUC                      | 0.99     | 0.98   | 0.99  | 0.99       |
|                   | IR F1-score                 | 0.91     | 0.86   | 0.91  | 0.91       |
|                   | IR AUPRC                    | 0.97     | 0.94   | 0.96  | 0.97       |
|                   | <i>Arabidopsis thaliana</i> | Accuracy | 89.89  | 88.72 | 88.98      |
| Micro-average AUC |                             | 0.98     | 0.98   | 0.98  | 0.99       |
| Macro-average AUC |                             | 0.98     | 0.98   | 0.98  | 0.98       |
| ES accuracy       |                             | 97.15    | 96.08  | 96.63 | 97.38      |
| ES precision      |                             | 91.84    | 94.67  | 89.32 | 91.99      |
| ES recall         |                             | 85.96    | 74.38  | 84.48 | 87.68      |
| ES AUC            |                             | 0.99     | 0.98   | 0.98  | 0.99       |
| ES F1-score       |                             | 0.89     | 0.83   | 0.87  | 0.90       |
| ES AUPRC          |                             | 0.95     | 0.93   | 0.93  | 0.96       |
| AA accuracy       |                             | 94.91    | 94.39  | 93.88 | 95.11      |
| AA precision      | 89.90                       | 87.85    | 85.92  | 90.99 |            |

|      |                   |       |       |       |       |
|------|-------------------|-------|-------|-------|-------|
|      | AA recall         | 91.90 | 92.49 | 93.08 | 91.31 |
|      | AA AUC            | 0.98  | 0.98  | 0.98  | 0.99  |
|      | AA F1-score       | 0.91  | 0.9   | 0.89  | 0.91  |
|      | AA AUPRC          | 0.97  | 0.96  | 0.96  | 0.97  |
|      | AD accuracy       | 94.20 | 93.62 | 93.97 | 94.91 |
|      | AD precision      | 92.62 | 83.64 | 94.52 | 92.16 |
|      | AD recall         | 78.32 | 86.12 | 75.35 | 82.53 |
|      | AD AUC            | 0.97  | 0.97  | 0.97  | 0.98  |
|      | AD F1-score       | 0.85  | 0.85  | 0.84  | 0.87  |
|      | AD AUPRC          | 0.93  | 0.93  | 0.94  | 0.94  |
|      | IR accuracy       | 93.52 | 93.36 | 93.49 | 94.07 |
|      | IR precision      | 88.17 | 90.58 | 88.88 | 89.53 |
|      | IR recall         | 96.04 | 92.33 | 94.95 | 95.79 |
|      | IR AUC            | 0.98  | 0.98  | 0.98  | 0.98  |
|      | IR F1-score       | 0.92  | 0.91  | 0.92  | 0.93  |
|      | IR AUPRC          | 0.96  | 0.96  | 0.96  | 0.96  |
| Rice | Accuracy          | 89.01 | 87.93 | 88.77 | 90.02 |
|      | Micro-average AUC | 0.98  | 0.98  | 0.98  | 0.98  |
|      | Macro-average AUC | 0.98  | 0.98  | 0.97  | 0.98  |
|      | ES accuracy       | 95.28 | 94.15 | 95.34 | 95.40 |
|      | ES precision      | 84.20 | 81.69 | 90.65 | 88.22 |
|      | ES recall         | 93.64 | 90.61 | 85.15 | 88.48 |
|      | ES AUC            | 0.99  | 0.98  | 0.98  | 0.98  |
|      | ES F1-score       | 0.89  | 0.86  | 0.88  | 0.88  |
|      | ES AUPRC          | 0.96  | 0.95  | 0.94  | 0.96  |
|      | AA accuracy       | 93.55 | 92.77 | 93.25 | 94.44 |
|      | AA precision      | 89.74 | 92.07 | 88.39 | 93.07 |
|      | AA recall         | 88.67 | 83.1  | 89.26 | 88.07 |
|      | AA AUC            | 0.98  | 0.97  | 0.97  | 0.98  |
|      | AA F1-score       | 0.89  | 0.87  | 0.89  | 0.91  |
|      | AA AUPRC          | 0.96  | 0.95  | 0.95  | 0.97  |
|      | AD accuracy       | 94.5  | 95.1  | 94.5  | 95.52 |
|      | AD precision      | 84.05 | 88.53 | 85.91 | 90.70 |
|      | AD recall         | 78.00 | 77.20 | 75.60 | 78.00 |
|      | AD AUC            | 0.96  | 0.97  | 0.96  | 0.98  |
|      | AD F1-score       | 0.81  | 0.82  | 0.80  | 0.84  |
|      | AD AUPRC          | 0.89  | 0.91  | 0.85  | 0.91  |
|      | IR accuracy       | 94.68 | 93.85 | 94.44 | 94.68 |
|      | IR precision      | 93.43 | 88.36 | 89.15 | 88.50 |
|      | IR recall         | 91.37 | 95.09 | 95.94 | 97.63 |
|      | IR AUC            | 0.99  | 0.98  | 0.98  | 0.99  |

|             |      |      |      |      |
|-------------|------|------|------|------|
| IR F1-score | 0.92 | 0.92 | 0.92 | 0.93 |
| IR AUPRC    | 0.97 | 0.96 | 0.96 | 0.97 |

---



**Supplementary Table S6.** Performance of transfer learning, Related to STAR Methods

| Model             | Before transfer learning    |                             |                             |                             | After fine tune             |                             |                             |                             |
|-------------------|-----------------------------|-----------------------------|-----------------------------|-----------------------------|-----------------------------|-----------------------------|-----------------------------|-----------------------------|
|                   | <i>Arabidopsis thaliana</i> | Rice                        | Human                       | <i>Arabidopsis thaliana</i> | <i>Arabidopsis thaliana</i> | Rice                        | Human                       | <i>Arabidopsis thaliana</i> |
| Target            | Rice                        | <i>Arabidopsis thaliana</i> | <i>Arabidopsis thaliana</i> | Human                       | Rice                        | <i>Arabidopsis thaliana</i> | <i>Arabidopsis thaliana</i> | Human                       |
| accuracy          | 89.67                       | 88.50                       | 72.13                       | 66.50                       | 90.44                       | 88.69                       | 84.96                       | 66.82                       |
| micro-average AUC | 0.99                        | 0.98                        | 0.91                        | 0.86                        | 0.99                        | 0.98                        | 0.96                        | 0.87                        |
| macro-average AUC | 0.98                        | 0.98                        | 0.94                        | 0.82                        | 0.98                        | 0.98                        | 0.96                        | 0.83                        |
| ES accuracy       | 94.80                       | 95.85                       | 86.75                       | 73.73                       | 95.28                       | 95.79                       | 94.94                       | 74.26                       |
| ES precision      | 88.33                       | 82.18                       | 49.78                       | 72.77                       | 87.24                       | 82.39                       | 90.85                       | 73.23                       |
| ES recall         | 84.85                       | 87.44                       | 85.47                       | 68.59                       | 89.09                       | 86.45                       | 68.47                       | 69.47                       |
| ES AUC            | 0.99                        | 0.98                        | 0.93                        | 0.80                        | 0.99                        | 0.98                        | 0.95                        | 0.80                        |
| ES F1-score       | 0.87                        | 0.85                        | 0.63                        | 0.71                        | 0.88                        | 0.84                        | 0.78                        | 0.71                        |
| ES AUPRC          | 0.96                        | 0.93                        | 0.83                        | 0.68                        | 0.95                        | 0.92                        | 0.85                        | 0.68                        |
| AA accuracy       | 93.67                       | 94.49                       | 89.44                       | 86.03                       | 94.44                       | 94.62                       | 91.57                       | 86.95                       |
| AA precision      | 88.25                       | 92.10                       | 82.79                       | 61.06                       | 91.84                       | 91.13                       | 79.37                       | 63.99                       |
| AA recall         | 91.05                       | 87.56                       | 77.93                       | 79.75                       | 89.46                       | 89.20                       | 93.90                       | 76.67                       |
| AA AUC            | 0.98                        | 0.98                        | 0.95                        | 0.93                        | 0.98                        | 0.98                        | 0.97                        | 0.93                        |
| AA F1-score       | 0.90                        | 0.90                        | 0.80                        | 0.69                        | 0.91                        | 0.90                        | 0.86                        | 0.70                        |
| AA AUPRC          | 0.97                        | 0.96                        | 0.91                        | 0.80                        | 0.97                        | 0.96                        | 0.94                        | 0.80                        |

|              |       |       |       |       |       |       |       |       |
|--------------|-------|-------|-------|-------|-------|-------|-------|-------|
| AD accuracy  | 96.00 | 93.52 | 86.97 | 90.92 | 96.06 | 93.71 | 93.26 | 90.67 |
| AD precision | 90.67 | 92.98 | 64.14 | 77.31 | 90.00 | 94.43 | 91.40 | 74.75 |
| AD recall    | 81.60 | 74.41 | 84.56 | 67.79 | 82.80 | 74.10 | 74.57 | 70.18 |
| AD AUC       | 0.98  | 0.97  | 0.95  | 0.96  | 0.98  | 0.97  | 0.97  | 0.95  |
| AD F1-score  | 0.86  | 0.83  | 0.73  | 0.72  | 0.86  | 0.83  | 0.82  | 0.72  |
| AD AUPRC     | 0.93  | 0.91  | 0.85  | 0.82  | 0.93  | 0.92  | 0.91  | 0.80  |
| IR accuracy  | 94.86 | 93.13 | 81.11 | 82.32 | 95.10 | 93.26 | 90.15 | 81.78 |
| IR precision | 91.19 | 86.63 | 90.70 | 47.50 | 91.25 | 87.00 | 85.35 | 45.96 |
| IR recall    | 94.59 | 97.14 | 56.70 | 44.06 | 95.26 | 96.97 | 89.81 | 44.71 |
| IR AUC       | 0.99  | 0.97  | 0.95  | 0.61  | 0.99  | 0.97  | 0.95  | 0.64  |
| IR F1-score  | 0.93  | 0.92  | 0.70  | 0.46  | 0.93  | 0.92  | 0.88  | 0.45  |
| IR AUPRC     | 0.97  | 0.95  | 0.87  | 0.43  | 0.97  | 0.95  | 0.9   | 0.44  |

---

**Supplementary Table S7.** Transcripts of Iso-Seq data from *Amborella*, Related to STAR Methods

| Tissue | Library size (kb) | Read of inserts (ROIs) | Full-length ROIs | ICE-QUIVER isoforms | Polished isoforms | Cd-hit-est | Transcripts produced by annotated genes |
|--------|-------------------|------------------------|------------------|---------------------|-------------------|------------|-----------------------------------------|
| leaf   | 1-2               | 80 923                 | 45 099           | 25 274              | 2523              |            |                                         |
| leaf   | 2-3               | 150 845                | 61 028           | 37 084              |                   |            |                                         |
| leaf   | 3-6               | 151 220                | 45 905           | 30 083              | 4248              |            |                                         |
| flower | 1-2               | 36 098                 | 15 743           | 11 762              | 1772              |            |                                         |
| flower | 2-3               | 61 836                 | 21 983           | 17 090              | 1860              |            |                                         |
| flower | 3-6               | 134 238                | 33 959           | 29 103              | 1969              |            |                                         |
| all    |                   | 615 160                | 223 717          | 150 396             | 12 372            | 10 767     | 8 918                                   |

**Supplementary Table S8.** Performance of DeepASmRNA of Iso-Seq data from *Amborella* compared with AStrap using the PASA dataset as the ground truth, Related to Figure 6

| Type                | PASA | DeepASmRNA |                       |               |            |          | AStrap    |                       |               |            |          |
|---------------------|------|------------|-----------------------|---------------|------------|----------|-----------|-----------------------|---------------|------------|----------|
|                     |      | AS events  | Overlapping with PASA | Precision (%) | Recall (%) | F1-score | AS events | Overlapping with PASA | Precision (%) | Recall (%) | F1-score |
| ES                  | 325  | 372        | 281                   | 75.54         | 86.46      | 0.81     | 139       | 109                   | 78.42         | 33.54      | 0.47     |
| AA                  | 1236 | 1014       | 852                   | 84.02         | 68.93      | 0.76     | 66        | 47                    | 71.21         | 3.80       | 0.07     |
| AD                  | 444  | 484        | 361                   | 74.59         | 81.31      | 0.78     | 90        | 57                    | 63.33         | 12.84      | 0.21     |
| IR                  | 1307 | 1188       | 1128                  | 94.95         | 86.30      | 0.90     | 465       | 441                   | 94.84         | 33.74      | 0.50     |
| All                 | 3312 | 3058       | 2622                  | 85.74         | 79.17      | 0.82     | 760       | 654                   | 86.05         | 22.95      | 0.36     |
| AS transcript pairs | 1973 | 1676       | 1577                  | 94.09         | 79.92      | 0.86     | 688       | 675                   | 98.17         | 34.21      | 0.51     |

**Supplementary Table S9.** Confusion matrix for AS events of Iso-Seq data from *Amborella* identified by DeepASmRNA, AStrap using the PASA dataset as the ground truth, Related to STAR Methods

| Type | DeepASmRNA |     |     |      | AStrap |    |    |     |
|------|------------|-----|-----|------|--------|----|----|-----|
|      | ES         | AA  | AD  | IR   | ES     | AA | AD | IR  |
| ES   | 281        | 22  | 25  | 13   | 109    | 5  | 13 | 4   |
| AA   | 27         | 852 | 11  | 30   | 8      | 47 | 6  | 9   |
| AD   | 33         | 47  | 361 | 17   | 17     | 3  | 57 | 11  |
| IR   | 31         | 93  | 87  | 1128 | 5      | 11 | 14 | 441 |

**Supplementary Table S10.** Performance of DeepASmRNA before data augmentation in classification, Related to STAR Methods

| Model                |               | Human | <i>Arabidopsis thaliana</i> | Rice  |
|----------------------|---------------|-------|-----------------------------|-------|
| Overall accuracy (%) |               | 87.68 | 90.29                       | 89.12 |
| ES                   | Precision (%) | 91.62 | 83.33                       | 79.31 |
|                      | Recall (%)    | 90.45 | 71.82                       | 70.99 |
| AA                   | Precision (%) | 83.16 | 93.65                       | 91.36 |
|                      | Recall (%)    | 83.24 | 90.02                       | 91.74 |
| AD                   | Precision (%) | 85.56 | 87.58                       | 87.98 |
|                      | Recall (%)    | 86.39 | 85.76                       | 84.70 |
| IR                   | Precision (%) | 81.55 | 90.28                       | 90.15 |
|                      | Recall (%)    | 85.42 | 95.51                       | 93.94 |

**Supplementary Table S11.** The results of the grid search for the criteria of filtering the transcripts in identification, Related to STAR Methods

| Species                     | Identity (%) | Metrics   | Coverage (%) |       |       |       |       |
|-----------------------------|--------------|-----------|--------------|-------|-------|-------|-------|
|                             |              |           | 50           | 60    | 70    | 80    | 90    |
| Human                       | 96           | Recall    | 81.72        | 80.89 | 80.85 | 80.55 | 74.46 |
|                             |              | Precision | 91.98        | 92.32 | 92.43 | 92.63 | 93.47 |
|                             |              | F1-score  | 0.87         | 0.86  | 0.86  | 0.86  | 0.83  |
|                             | 97           | Recall    | 81.31        | 81.17 | 80.96 | 78.57 | 74.29 |
|                             |              | Precision | 91.43        | 91.46 | 91.94 | 92.39 | 93.01 |
|                             |              | F1-score  | 0.86         | 0.86  | 0.86  | 0.85  | 0.83  |
|                             | 98           | Recall    | 80.98        | 80.7  | 80.66 | 78.78 | 74.18 |
|                             |              | Precision | 91.76        | 91.89 | 92.17 | 92.68 | 93.4  |
|                             |              | F1-score  | 0.86         | 0.86  | 0.86  | 0.85  | 0.83  |
|                             | 99           | Recall    | 80.32        | 80.23 | 80.02 | 78.65 | 73.37 |
|                             |              | Precision | 91.79        | 92.12 | 92.31 | 92.76 | 93.37 |
|                             |              | F1-score  | 0.86         | 0.86  | 0.86  | 0.85  | 0.82  |
|                             | 100          | Recall    | 80.09        | 80.01 | 79.7  | 78.3  | 73.94 |
|                             |              | Precision | 91.86        | 92.36 | 92.58 | 92.47 | 93.32 |
|                             |              | F1-score  | 0.86         | 0.86  | 0.86  | 0.85  | 0.83  |
| <i>Arabidopsis thaliana</i> | 96           | Recall    | 83.78        | 83.67 | 83.22 | 83.36 | 77.13 |
|                             |              | Precision | 94.29        | 94.33 | 94.43 | 94.64 | 95.53 |
|                             |              | F1-score  | 0.89         | 0.89  | 0.88  | 0.89  | 0.85  |
|                             | 97           | Recall    | 83.57        | 83.43 | 83.01 | 81.17 | 76.88 |
|                             |              | Precision | 94.32        | 94.35 | 94.44 | 94.66 | 95.56 |
|                             |              | F1-score  | 0.89         | 0.89  | 0.88  | 0.87  | 0.85  |
|                             | 98           | Recall    | 83.36        | 83.21 | 82.79 | 80.91 | 76.57 |
|                             |              | Precision | 94.36        | 94.38 | 94.49 | 94.69 | 95.61 |
|                             |              | F1-score  | 0.89         | 0.88  | 0.88  | 0.87  | 0.85  |
|                             | 99           | Recall    | 83.17        | 83.01 | 82.5  | 80.77 | 76.28 |
|                             |              | Precision | 94.62        | 94.64 | 94.7  | 94.91 | 95.88 |
|                             |              | F1-score  | 0.89         | 0.88  | 0.88  | 0.87  | 0.85  |
|                             | 100          | Recall    | 82.98        | 82.86 | 82.33 | 80.59 | 76.07 |
|                             |              | Precision | 94.64        | 94.65 | 94.71 | 94.93 | 95.89 |
|                             |              | F1-score  | 0.88         | 0.88  | 0.88  | 0.87  | 0.85  |
| Rice                        | 96           | Recall    | 81.07        | 80.8  | 80.6  | 80.36 | 75.03 |
|                             |              | Precision | 92.66        | 92.71 | 92.81 | 93.44 | 94.49 |
|                             |              | F1-score  | 0.86         | 0.86  | 0.86  | 0.86  | 0.84  |
|                             | 97           | Recall    | 81.4         | 81.22 | 80.26 | 78.96 | 74.17 |
|                             |              | Precision | 92.74        | 92.89 | 92.94 | 93.5  | 94.74 |

|     |           |       |       |       |       |       |
|-----|-----------|-------|-------|-------|-------|-------|
|     | F1-score  | 0.87  | 0.87  | 0.86  | 0.86  | 0.83  |
| 98  | Recall    | 81.21 | 80.5  | 79.99 | 78.13 | 74.51 |
|     | Precision | 92.88 | 92.95 | 93.02 | 94.57 | 94.61 |
|     | F1-score  | 0.87  | 0.86  | 0.86  | 0.86  | 0.83  |
| 99  | Recall    | 80.97 | 80.88 | 79.59 | 78.13 | 73.58 |
|     | Precision | 92.98 | 93.07 | 93.19 | 94.82 | 95.29 |
|     | F1-score  | 0.87  | 0.87  | 0.86  | 0.86  | 0.83  |
| 100 | Recall    | 80.67 | 80.04 | 79.47 | 78.3  | 73.81 |
|     | Precision | 93.01 | 93.09 | 93.23 | 94.84 | 95.31 |
|     | F1-score  | 0.86  | 0.86  | 0.86  | 0.86  | 0.83  |

---



**Supplementary Table S12.** Hyperparameters of DeepASmRNA in classification, Related to STAR Methods

| Parameters                                        | Value | Explanation or citation                                                                                                                                                                                                                                                                                                                                                                                                                                                                                                                                                                                                       |
|---------------------------------------------------|-------|-------------------------------------------------------------------------------------------------------------------------------------------------------------------------------------------------------------------------------------------------------------------------------------------------------------------------------------------------------------------------------------------------------------------------------------------------------------------------------------------------------------------------------------------------------------------------------------------------------------------------------|
| Kernel size of each CNN layer except the last one | 12    | According to JASPAR ( <a href="https://jaspar.genereg.net/#">https://jaspar.genereg.net/#</a> ), most motifs are less than 12bp in length; we also tried 6 bp and found 12 bp had a better performance.                                                                                                                                                                                                                                                                                                                                                                                                                       |
| Stride of each CNN layer                          | 1     | The default setting of tensorflow.                                                                                                                                                                                                                                                                                                                                                                                                                                                                                                                                                                                            |
| Activation of each CNN layer                      | relu  | According to the tutorial of tensorflow ( <a href="https://tensorflow.google.cn/tutorials/images/cnn">https://tensorflow.google.cn/tutorials/images/cnn</a> ), we also tried sigmoid and relu has faster convergence and better performance.                                                                                                                                                                                                                                                                                                                                                                                  |
| Filters of the first CNN layer                    | 30    | Similar to a tutorial of tensorflow ( <a href="https://tensorflow.google.cn/tutorials/images/cnn">https://tensorflow.google.cn/tutorials/images/cnn</a> ).                                                                                                                                                                                                                                                                                                                                                                                                                                                                    |
| Filters of the second CNN layer                   | 100   | Similar to the tutorial of tensorflow ( <a href="https://tensorflow.google.cn/tutorials/images/cnn">https://tensorflow.google.cn/tutorials/images/cnn</a> ). We tried 64 as they did, but sometimes the model will be trained into a local minimum and get only about 44% accuracy. So, we enlarge this hyper-parameter to make the model have more parameters to train. This value is also chosen based on the API of tensorflow ( <a href="https://tensorflow.google.cn/versions/r2.1/api_docs/python/tf/keras/layers/Attention">https://tensorflow.google.cn/versions/r2.1/api_docs/python/tf/keras/layers/Attention</a> ) |
| Pool size of the maxpool layer                    | 2     | Same as <a href="https://tensorflow.google.cn/tutorials/images/cnn">https://tensorflow.google.cn/tutorials/images/cnn</a>                                                                                                                                                                                                                                                                                                                                                                                                                                                                                                     |
| Stride of the max pool layer                      | 2     | Same as <a href="https://tensorflow.google.cn/tutorials/images/cnn">https://tensorflow.google.cn/tutorials/images/cnn</a>                                                                                                                                                                                                                                                                                                                                                                                                                                                                                                     |
| Filters of the last CNN layer                     | 200   | We kept the filters getting more and more when the layer went to the latter, similar to ( <a href="https://tensorflow.google.cn/tutorials/images/classification">https://tensorflow.google.cn/tutorials/images/classification</a> ). we also tried 100 as the second layer, and the local minimal happens as the description of filters of the second CNN layer, so we also expand the filters of the last CNN layer to eliminate local minimal.                                                                                                                                                                              |
| Kernel size of the last CNN layer                 | 42    | This is a global CNN layer, 42 is the input length of this layer.                                                                                                                                                                                                                                                                                                                                                                                                                                                                                                                                                             |
| Units of the first dense layer                    | 32    | Same as <a href="https://tensorflow.google.cn/tutorials/images/cnn">https://tensorflow.google.cn/tutorials/images/cnn</a> .                                                                                                                                                                                                                                                                                                                                                                                                                                                                                                   |
| Activation of the first dense layer               | relu  | Same as <a href="https://tensorflow.google.cn/tutorials/images/cnn">https://tensorflow.google.cn/tutorials/images/cnn</a> .                                                                                                                                                                                                                                                                                                                                                                                                                                                                                                   |

---

|                                         |         |                                                                       |
|-----------------------------------------|---------|-----------------------------------------------------------------------|
| A dropout rate of the first dense layer | 0.6     | We tried 0.5, 0.6, 0.7, 0.8, and 0.9 which have the best performance. |
| Units of the last dense layer           | 4       | The classes of our model to predict                                   |
| Activation of the last dense layer      | softmax | The most used activation of multi-classifier.                         |

---
